# Supplementary material
Source: PubMed Central journal article supplement (PMC2685625)
Supplement: tpc.108.059154_1.pdf [file tpc.108.059154_1.pdf]

Supplemental Data. Endo et al. (2009). Identifying new components participating in the secondary cell wall Formation of vessel elements in *Zinnia* and *Arabidopsis*.

**A**

|           |                                                                      |
|-----------|----------------------------------------------------------------------|
| Ze TED7-1 | MASPLSQSVFPHFPPPSPAATPPPAPTTPSTPPPHFISPPPHSVPPPSPPHSVPPPLHPV         |
| Ze TED7-2 | MASHLSQSLFPHFPPPSPAATPPPAPTTPSTPPPHFISPPPHSVPPPSPPHSVPPPLHPV         |
| Ze TED6   | -----                                                                |
| <br>      |                                                                      |
| Ze TED7-1 | PPPSPPHPVSPPPHTVPPPSPPHPVSPPPHTVPPPSPPHPVFPPPHTVPPPSP-HFVPPP         |
| Ze TED7-2 | PPPLPPHSVPPPSHTVPPPSPPHPVSPPPHTVPPPSPPHPVSPPPHTVPPPSPPHHVSP          |
| Ze TED6   | -----                                                                |
| <br>      |                                                                      |
| Ze TED7-1 | PNMVPPSPPHANPPPPPPHSVPPPPHTVPPPPPPPHIIPPAHALSPPPHIIPPPPP             |
| Ze TED7-2 | PHTVPPSP-----HFVPPPNTVPPPPAPHFVPPP-----PPPYIIPPPPP                   |
| Ze TED6   | -----                                                                |
| <br>      |                                                                      |
| Ze TED7-1 | <u>SPSNHSTTIVVIFVSCGGVFFLAFAMAALWCFLKKKKK-KMVOKAENIHFDEHRKVTERI</u>  |
| Ze TED7-2 | <u>SPSNHSTTIVVIFVSCGGVFFLAFAMAALWCFLKKKKK-KMVRKAENIHFDEHRKVTERI</u>  |
| Ze TED6   | ----- <u>MATIFIVFVSFGCVFVLGIAAFVLCCLIKKWKCSKAIEKNEMVHVDOHLOVHENI</u> |
|           | :**.:*** * **.*:* . * *::** * * :.* * :*.** :* *.*                   |
| <br>      |                                                                      |
| Ze TED7-1 | <u>EOGPHGTETAILSVEDDIHIEEDIKKSELENFRKGLHLNYGNTYNIDTGKPSSSFHHYL</u>   |
| Ze TED7-2 | <u>EOGPHGTETAILSVEDDIHIEEDIKKSEIEDFRKGLHLNYGNTYNIDTGKPSSSFHHYL</u>   |
| Ze TED6   | <u>LOGPNGMKTVAITVDDDLHVHDEEE-----CVKNEKLGTAASKA-----</u>             |
|           | ***:* :*. :*:***:~::~ : . * . *..*:* .                               |
| <br>      |                                                                      |
| Ze TED7-1 | HG                                                                   |
| Ze TED7-2 | HG                                                                   |
| Ze TED6   | --                                                                   |

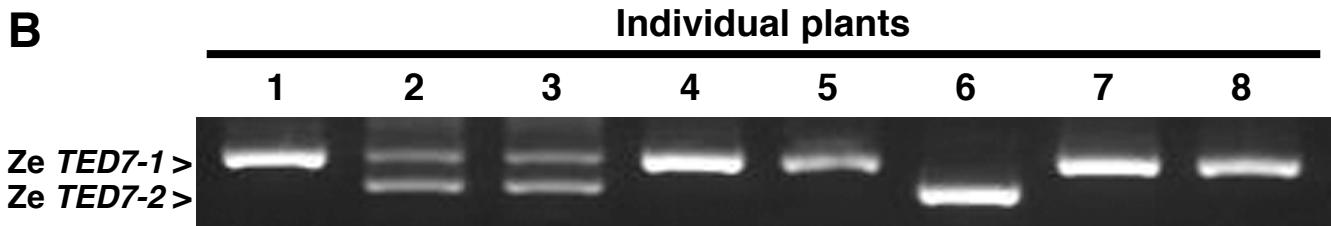

**Supplemental Figure 1. Comparison of Ze TED6, Ze TED7-1 and Ze TED7-2.** (A) Amino acid sequences deduced from Ze TED6, Ze TED7-1, and Ze TED7-2 cDNAs. Underlines indicate sequences corresponding to Z1943 and Z16653 EST clones. (B) Genotyping of eight individual *Zinnia* plants. Primers were designed to be able to amplify both Ze TED7-1 and Ze TED7-2.

**A**

Ze TED6  
At1g43790 / At TED6  
eugene3.00020671  
Ze TED7-1  
Ze TED7-2  
At5g48920 / At TED7  
eugene3.00070382  
fgenesish1\_pg.C\_LG\_V000008  
Os08g0108300

MASPLSQSVFPHFPPPSAATPPFAPTTPSTPPPHFISPPPHSVPPSPPHSVPPPLHPVPPSPPHVSPPPHTVPPSPPHVSP  
MASHLSQSLFPHFPPPSAATPPFAPTTPSTPPPHFISPPPHSVPPSPPHSVPPPLHPVPPSPPHVSP

MAP  
MAPLDNYDYNFYFPLPPPHNPPSPPKVVPHPNYSPPKGSPPHNPPPH  
MTFNPGSPGFGFPFFFYPPNPNFYAPLNPNAPKPFVMPRRPQAPPPPPQRFPPPPAPPIRPPSPGGRAPPPGRAPPPPSQA

Ze TED6  
At1g43790 / At TED6  
eugene3.00020671  
Ze TED7-1  
Ze TED7-2  
At5g48920 / At TED7  
eugene3.00070382  
fgenesish1\_pg.C\_LG\_V000008  
Os08g0108300

MASNSTDSV  
MAASNLDFFYSPPPSHSHFQPPSPPHVRRPPPHIRPPPP  
PPHTVPPSPPHVFPVPPHTVPPSPHFVPPPNMVPPSPPHANPPPPPPHSPVPPPHTVPPPPPHIIPPPAHALSPPPHII  
PPSHTVPPSPPHVSPPPHTVPPSPPHVSPPPHTVPPSPPHVSPPPHTVPPSPPHVSPPPHTVPPSPPHVSPPPHTVPPSPPHVSP  
MAASVEYFFYSPSHQHLPSPVPPPSHISPPPPPSPPHPPPHHFSPPHQPPPSYPHPPPPSPYPHHQPPPPHV  
TNNYDYNFYFPLPPPHNPPSPPKVAPPSSPPNVSPPHNFPPPHITPPSPKVPVPPPHHTVPPHTPHPPPPPHIIPPPPHVI  
IIPSPPKVVPHPNYSPPKGSPPHNPPPHIIPSPPKVPPPHHTVPPSPFPVPPATPPNHPFHPPPPPHIIPPPSPHIIPAPSHVI  
PPPPRRAPPPALPPPPRRAPPPSMPPPPRRAPPPATPPPPRRAPPPSPPIRPPPPTRPYAPPPSHPLAPPPIHS

Ze TED6  
At1g43790 / At TED6  
eugene3.00020671  
Ze TED7-1  
Ze TED7-2  
At5g48920 / At TED7  
eugene3.00070382  
fgenesish1\_pg.C\_LG\_V000008  
Os08g0108300

MATIFIVFVSGCVFVLGIAAFVLCCLIKKWKCSKAIEKNEMVHVVDQHLQVHENILQGPNGMKTVAITVDDDLHVHDE  
YRPTPTPDHDTTIVVVVSVLGCVMFLAFLAFVWFLIKKRSRKHRESEAVRVDEHFKMKEAIVEGPNQKSVVLSVEDDVKIEDA  
LPPAPSPSNTTIVIVFVSGGLIFLAFALAAALCFIKKKKKTVEETDIVVHVEHLKVKEAIVEGPHGPKAVVLEIVDDVHIGEE  
PPPPSPSNHSTTIVIVFVSGGVFLAFAMAALWCFLKKKKKMKVQKAENIHFDEHRKVTERIEQGPHTGTETALLSVEDDIHIED  
PPPPSPSNHSTTIVIVFVSGGVFLAFAMAALWCFLKKKKKMKVQKAENIHFDEHRKVTERIEQGPHTGTETALLSVEDDIHIED  
LPPPPTPAPGHVVIIVVVISLGLFFLAFALAAALCYLKKRRKSSSTKAEIIEFDEHLKVQETIVQGPHEQTRVVMLEEDIHLVED  
PPPPPTPGHSTVIIVVVISLGLFFLAFALAAALCFIKKKKKTVEETDIVVHVEHLKVKEAIVEGPHGPKAVVLEIVDDVHIGEE  
PPPPPTPGHSTVIIVVVISLGLFFLAFALAAALCFIKKKKKTVEETDIVVHVEHLKVKEAIVEGPHGPKAVVLEIVDDVHIGEE  
PAPVPPPPSPPHIIVIVFVSGGLLLLACLAAALFCWHKKRRETERKAEVHNLSGHVHVHKATESGSPGAKATVLSIDEDLKFQEV  
\* H GP G \*D \* \*

Ze TED6  
At1g43790 / At TED6  
eugene3.00020671  
Ze TED7-1  
Ze TED7-2  
At5g48920 / At TED7  
eugene3.00070382  
fgenesish1\_pg.C\_LG\_V000008  
Os08g0108300

EECVKNEKLGTAASKA  
IKREEKDLKKGGVGSSVSVRS  
IKEEKVGEGLHAKAIEGNAGTVDQLAAPSSSGSNHRSRLEHKA  
IKKSELENFRKGLHLNYGNTYNIIDTGKPSSTFGHHYLG  
IKKSEIEDFRKGLHLNYGNTYNIIDTGKPSSTFGHHYLG  
IKKTEKLSRPSHLSSTGRHAIDISDPNHHFTEQKS  
IKKNEKLETSKSAHADRPLYSDIATPSSQYNQHHLEHKV  
IKKNEKLAEGSHIKLAHDPLDSDIATPSSSRNQHHLEHKV  
AGESSSAAGAGSHHTPWSWRRRQEGKAENKAEILNVTEHIVHVEKIVSGPQGQKIEILSEDEDIRFEEEGRKEKGDQRSKTRITRK  
(\* H GP G \*D \* \*)

**B**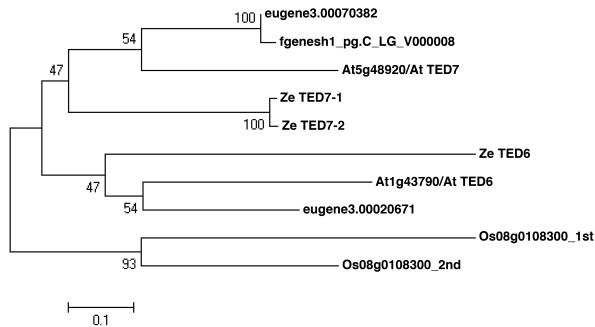**C**

At1g43790 / At TED6 HRERSEAVRV DEHFKMKEAI VEGPNQKSV VLSVEDDVKI EDAIK  
eugene3.00020671 TVEETDIVHV HEHLKVKEAI VEGPHGPKAV VLEIVDDVHI GEEIK  
Ze TED6 AIEKNEMVHV DQHLQVHENI LQGPNGMKTVAITVDDDLHV HDEEE  
Ze TED7-1 MVQKAENIHF DEHRKVTERI EQGPHGTETA ILSVEDDIHI EEDIK  
Ze TED7-2 MVRKAENIHF DEHRKVTERI EQGPHGTETA ILSVEDDIHI EEDIK  
eugene3.00070382 TVQKTEILEF DEHTKVQEA IVPGPHEKIT VLNIEEDVHL VEEIK  
fgenesish1\_pg.C\_LG\_V000008 TVQKTEILEF DEHTKVQEA IVPGPHEKIT VLNIEEDVHL VEEIK  
At5g48920 / At TED7 SSTKAEIIEF DEHLKVQETI VQGPHEQTR VVMLEEDIHL VEDIH  
Os08g0108300\_1st TERKAEVHNL SGHVHVHKAT ESGPSGAKAT VLSIDEDLKF QEVAG  
Os08g0108300\_2nd AENKAEILNV TEHIVHVEKI VSGPQGQKIE ILSEDEDIRF EEEGR

**Supplemental Figure 2. Comparison of Ze TED6 and Ze TED7 and Counterparts in *Arabidopsis*, *Populus*, and *Oryza*.** (A) Full-length amino acid sequences. Bold letters, transmembrane domains by SOSUI prediction; red letters, prolines at N-terminus sides; blue letters, sequences used in the overexpression experiment in Figure 3; underlines, Z1943 and Z16653 clone sequences. Conserved amino acids in C-terminus domains are shown at the bottom (note that Os08g0108300 has two repeats of the C-terminus domains). (B) Comparison of conserved regions on MEGA4 (Tamura et al., 2007) by the neighbor-joining method, bootstrapped (1000), and shown as a rooted tree (midpoint rooting). The duplicated domains of Os08g0108300 were divided (Os08g0108300\_1st and \_2nd). (C) Sequences used for (B).

### Reference

Tamura, K., Dudley, J., Nei, M., and Kumar, S. (2007). MEGA4: Molecular evolutionary genetics analysis (MEGA) software version 4.0. *Mol. Biol. Evol.* **24**: 1596–1599.

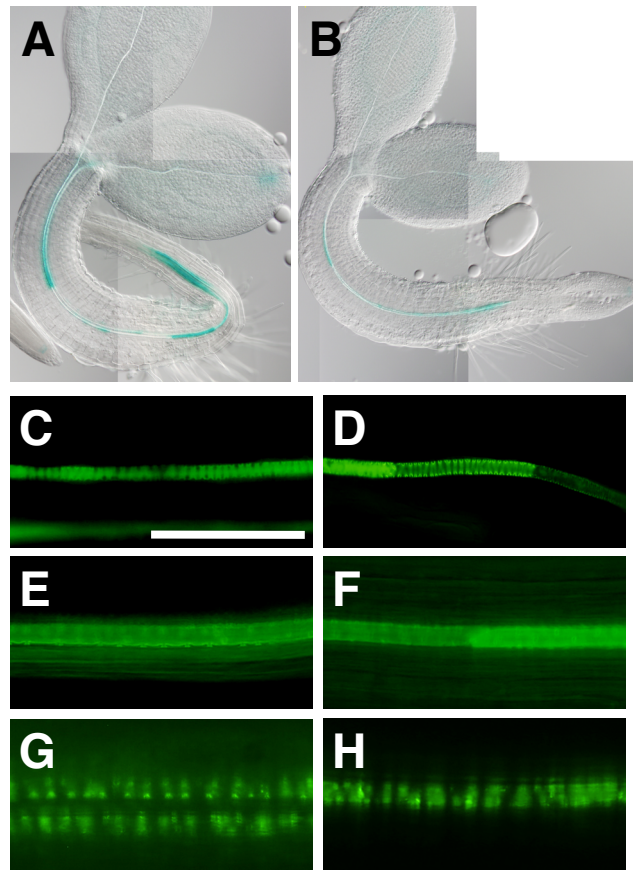

**Supplemental Figure 3. Expression Pattern of *At TED6* and *At TED7*.** (A) and (B) Promoter activities in seedlings at 3 d after imbibition. GUS reporter expression was examined by X-Gluc staining of *At TED6*<sub>pro</sub>:GUS (A) and *At TED7*<sub>pro</sub>:GUS (B) lines.

(C) to (H) Expression of YFP fusions under the control of native promoters in roots. YFP signals were observed in differentiating vessel elements in the protoxylem ([C] and [D]) and metaxylem ([E] to [H]) by *At TED6*<sub>pro</sub>:*At TED6*-YFP ([C], [E], and [G]) or *At TED7*<sub>pro</sub>:*At TED7*-YFP ([D], [F], and [H]). Bars in (C) for (C) to (H) = 50 μm.

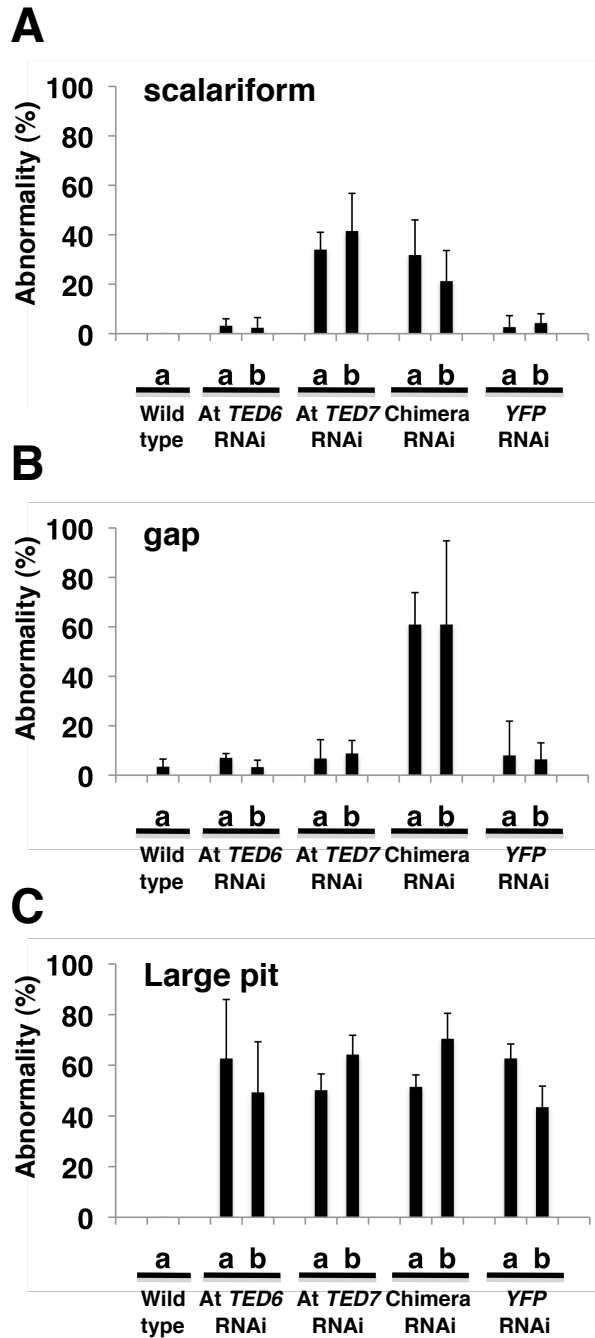

**Supplemental Figure 4. Transient RNAi Analysis on At *TED6* and At *TED7* in *Arabidopsis* Roots.** Abnormality represents frequencies of abnormal metaxylem vessel element-forming roots in an average of 20 lateral roots of individual lines (a, b). Lines a and b of At *TED6*, At *TED7*, and At *TED6*–*TED7* chimera RNAi are T2 plants that have been analyzed by RT-PCR. *YFP* RNAi is a control construct that expresses an inverted repeat of a partial *YFP* nucleotide sequence. Each data point represents the mean of three independent RNAi inductions  $\pm$  SD.

(A) Scalariform (ladder-shaped) metaxylem vessel elements as shown in Figure 5C.

(B) Gaps in metaxylem vessel strands as shown in Figure 5D.

(C) Metaxylem vessel elements with large pits as shown in Figure 5E.

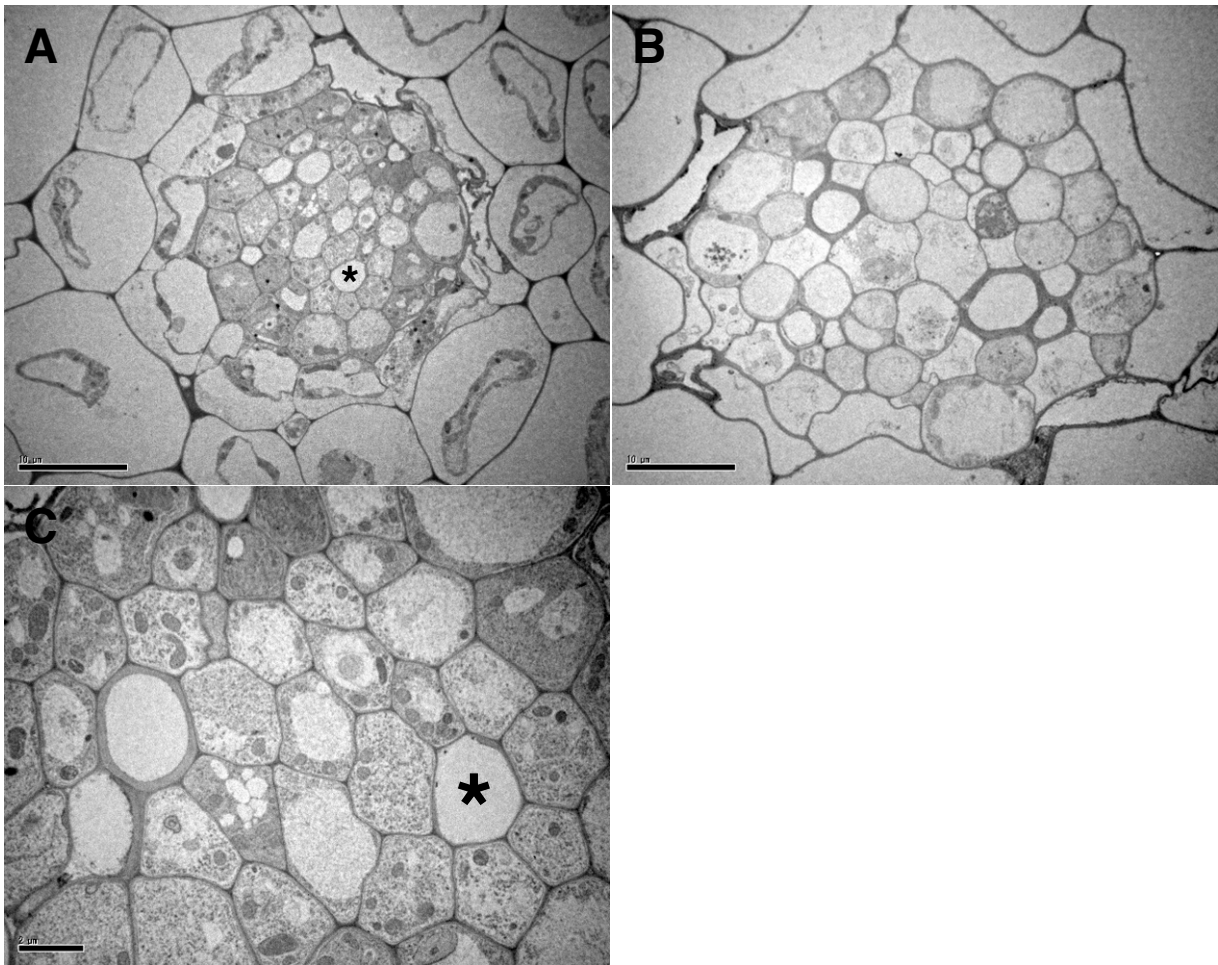

**Supplemental Figure 5. Transmission Electron Micrographs of the At *TED6-TED7* chimera RNAi Line.** Cross sections of transgenic *Arabidopsis* roots of At *TED6-TED7* chimera RNAi ([A] and [C]) and YFP RNAi (B) lines. The plants had been treated to induce RNAi in the same way used in the experiments shown in Figure 5 and Supplemental Figure 4 online. Note that the chimera RNAi plant showed a metaxylem vessel element with extremely thin SCW but no cellular content (asterisks). Bars in (A) and (B) = 10  $\mu\text{m}$ , in (C) = 2  $\mu\text{m}$ .

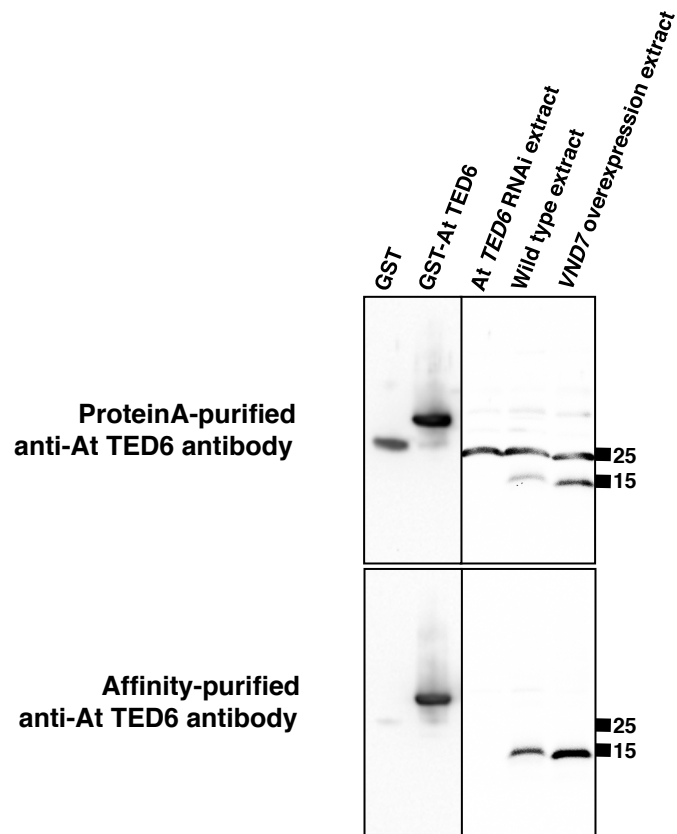

**Supplemental Figure 6. Affinity Purification of Anti-At TED6 Antibody.**

Characterization of Protein A-purified and affinity-purified anti-At TED6 antibody. The specificity was examined on glutathione-*S*-transferase (GST)-fusion protein and crude extracts of At TED6 RNAi, wild type, and plants showing ectopic TE differentiation by *VND7* overexpression. Numbers on the left indicate size markers (kDa).

**Supplemental Table 1. Summary of Single YFP and BiFC Signals in Wild Type and SCW-forming *Arabidopsis* Cells.** YFP signals were observed at 18 h and 48 h after the induction of *VND7* expression in leaves biolistically bombarded with the indicated constructs.

Signal: +++, strong intensity and high frequency; ++, moderate intensity and high frequency; +, weak intensity and some frequency; ±, occasionally detected; –, not detected

| Construct               | Signal            |                          |     |
|-------------------------|-------------------|--------------------------|-----|
|                         | Wild type<br>18 h | SCW-forming<br>18 h 48 h |     |
| YFP                     | +++               | +++                      | +++ |
| At TED6-YFP             | ++                | ++                       | ++  |
| YFP-IRX1                | –                 | ±                        | –   |
| YFP-IRX3                | –                 | +                        | –   |
| YFP-IRX5                | –                 | ±                        | –   |
| At TED6-cYFP, nYFP-IRX1 | –                 | –                        | –   |
| At TED6-cYFP, nYFP-IRX3 | –                 | +                        | –   |
| At TED6-cYFP, nYFP-IRX5 | –                 | –                        | –   |

**Supplemental Table 2. Primers Used in This Study.**

| Target                                                                                                                                                                                   | Forward primer sequence in 5'-3' orientation | Reverse primer sequence in 5'-3' orientation |
|------------------------------------------------------------------------------------------------------------------------------------------------------------------------------------------|----------------------------------------------|----------------------------------------------|
| <i>Zinnia</i> ESTs subcloned in pGEM-T Easy plasmid vector (Promega, <a href="http://www.promega.com/">http://www.promega.com/</a> ) for templates of <i>in vitro</i> RNA transcription. | TGTA AACGACGGCCAGTGAATTGTAATAC               | GAAACAGCTATGACCATGATTACGCCAAG                |
| <i>Ze TED7-1</i> and <i>TED7-2</i> genomic DNA for genotyping.                                                                                                                           | TTCCCTCATTTCACCGCCATC                        | TGTTGTGGAATGGTTGCTTGGAGA                     |
| <i>Ze TED6</i> full-length coding region for protein localization.                                                                                                                       | CACCATGGCCACCATATTCATTGTTTTCGTGTC A          | AGCTTTTGAAGTTGAAGCTGTCCCAAGCTT               |
| <i>Ze TED7</i> full-length coding region for protein localization.                                                                                                                       | CACCATGGCTTCTCCTCTTTCTCAATCCGTGTTC           | GCCATGCAGGTAGTGATGGCCAAA AACTGGA             |
| <i>Ze TED6</i> full-length coding region for overexpression.                                                                                                                             | CACCATGGCCACCATATTCATTGTTTTCGTGTC A          | TCAAGCTTTTGAAGTTGAAGCTGTCCCAAG               |
| <i>Ze TED7</i> full-length coding region for overexpression.                                                                                                                             | CACCATGGCTTCTCCTCTTTCTCAATCCGTGTTC           | TTAGCCATGCAGGTAGTGATGGCCAAA AACT             |
| <i>Ze TED6</i> C-terminal coding region for overexpression.                                                                                                                              | CACCATGTTGATCAAGAAATGGAAATGCAG               | TCAAGCTTTTGAAGTTGAAGCTGTCCCAAG               |
| <i>Ze TED7</i> C-terminal coding region for overexpression.                                                                                                                              | CACCATGTGGTGCTTCTCCTCAAGAAGAAG               | TTAGCCATGCAGGTAGTGATGGCCAAA AACT             |
| At <i>TED6</i> 5' upstream region for promoter assay.                                                                                                                                    | CACCGATTGATTCAATAGCCTCACGCTCTGATAC           | GGAGGCCATTACTTGTGTTTTGATGTGTGAG              |
| At <i>TED7</i> 5' upstream region for promoter assay.                                                                                                                                    | CACCTGAGAATCAACAAAGATTCTACGTGTGGC            | GGCAGCCATTTTGGGAGTATGTATGTACTT               |
| At <i>TED6</i> promoter and coding region for protein localization.                                                                                                                      | CACCGATTGATTCAATAGCCTCACGCTCTGATAC           | CGAACGGGAAACGACTGATGATCCA AACTCC             |
| At <i>TED7</i> promoter and coding region for protein localization.                                                                                                                      | CACCTGAGAATCAACAAAGATTCTACGTGTGGC            | GGACTTTTGCTCAGTAAAATGATGATTGGG               |
| At <i>TED6</i> full-length coding region for inverted repeat production and BiFC assay.                                                                                                  | CACCATGGCCTCCACGGATT CAGTTTACCGTCCC          | CGAACGGGAAACGACTGATGATCCA AACTCC             |
| At <i>TED7</i> full-length coding region for inverted repeat production.                                                                                                                 | CACCATGGCTGCCTCTGTGGAATACTTCCCTAT            | GGACTTTTGCTCAGTAAAATGATGATTGGG               |
| <i>IRX1/CesA8</i> coding region for BiFC assay.                                                                                                                                          | CACCATGATGGAGTCTAGGTCTCCCATCTG               | TTAGCAATCGATCAAAAGACAGTT CAGAGA              |
| <i>IRX3/CesA7</i> coding region for BiFC assay.                                                                                                                                          | CACCATGGAAGCTAGCGCCGGTCTTGTCGC               | TCAGCAGTTGATGCCACACTT GGAAGTGTC              |
| <i>IRX5/CesA4</i> coding region for BiFC assay.                                                                                                                                          | CACCATGGAACCAAACACCATGGCCAGCTT               | TTAACAGTCGACGCCACATTGCTTCAGT                 |
| At <i>TED6</i> partial cDNA for RT-PCR.                                                                                                                                                  | AGAGCCTCACACATCAAACACAAG                     | GGTAACATTATGAATGAAGAAAGCTC                   |
| <i>actin2</i> partial cDNA for RT-PCR.                                                                                                                                                   | CCGTTTTGAATCTTCTCAATC                        | ATACCGGTACCATTGT CACACA                      |
| At <i>TED7</i> partial cDNA for RT-PCR.                                                                                                                                                  | AACCATTAAAGTACATACACTCCC                     | ATGATTGTTTACATTTT GAGCCTTTTG                 |
| <i>ubiquitin</i> partial cDNA for RT-PCR.                                                                                                                                                | TCCAATGTGATCCAACAGAGAC                       | TTCAAAGTCAAAGCCACA AACTG                     |
| At <i>TED6</i> C-terminal region into <i>SmaI</i> site of pGEX6P-1 plasmid vector for antigen production.                                                                                | CACCATGTTGATCAAGAAGAGATCCAGGAAGCACCGT        | TCACGAACGGGAAACGACTGATGATCCA AACTCC          |
